# Supplementary material for: S6K1 controls pancreatic β cell size independently of intrauterine growth restriction
Source: JCI journal article supplement (doi:10.1172/jci77030), 2015-06-14
Supplement: sd1 [file 1]

Supplemental Figure 1

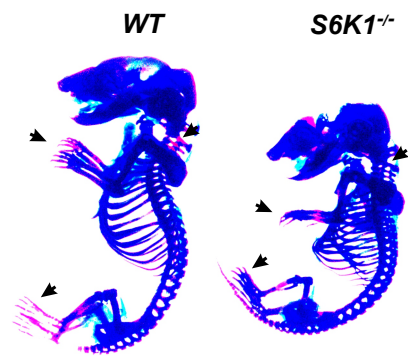

Supplemental Figure 2

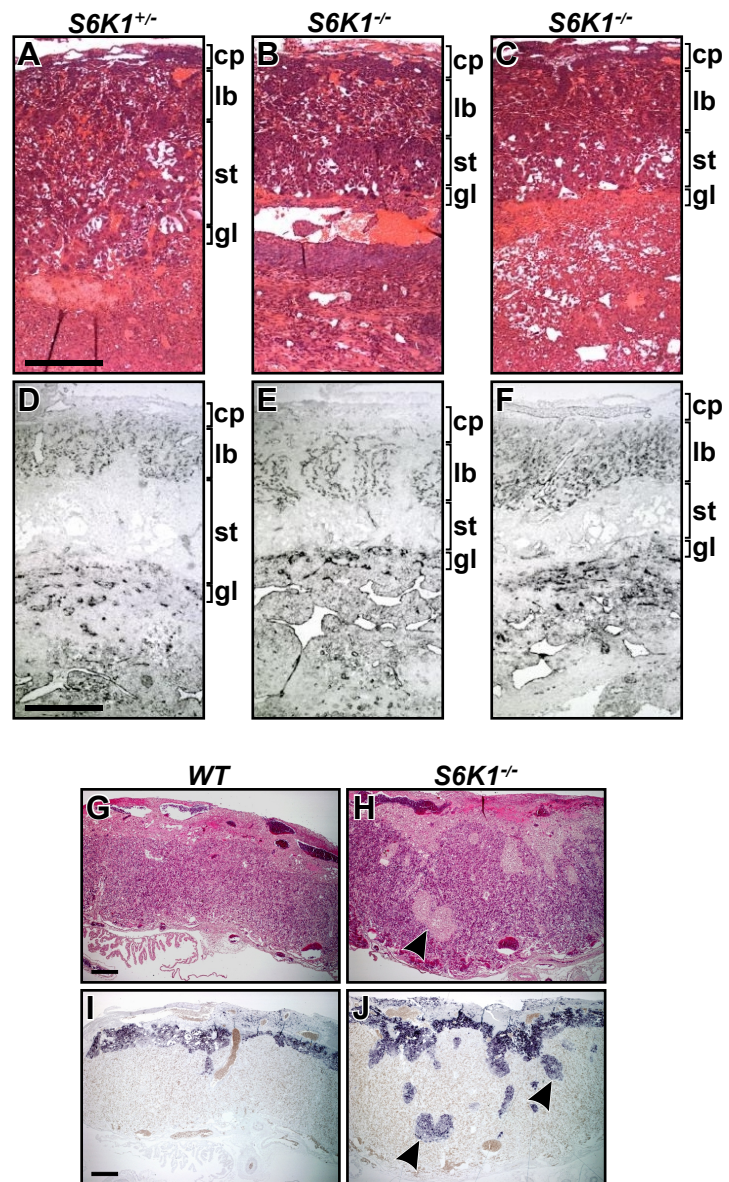

Supplemental Figure 3

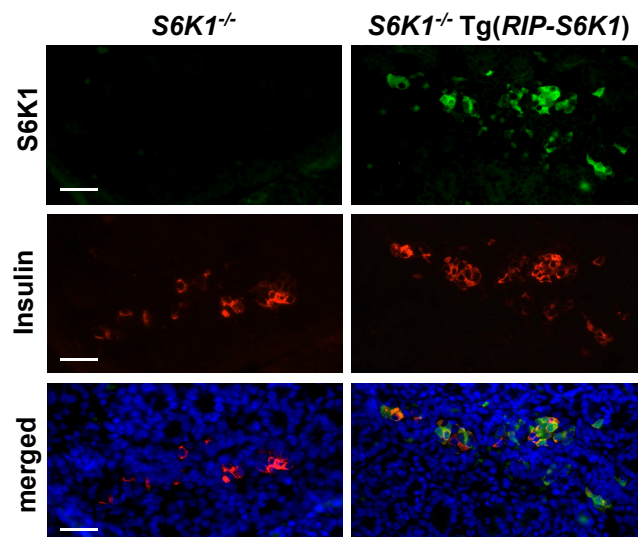

Supplemental Figure 4

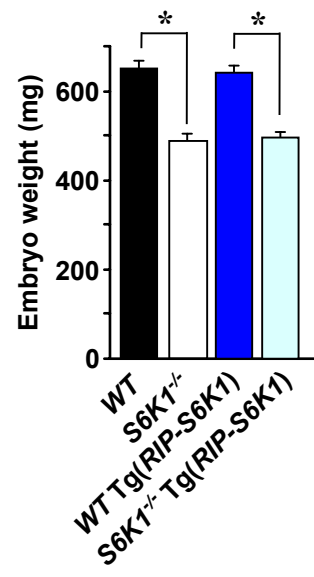

Supplemental Figure 5

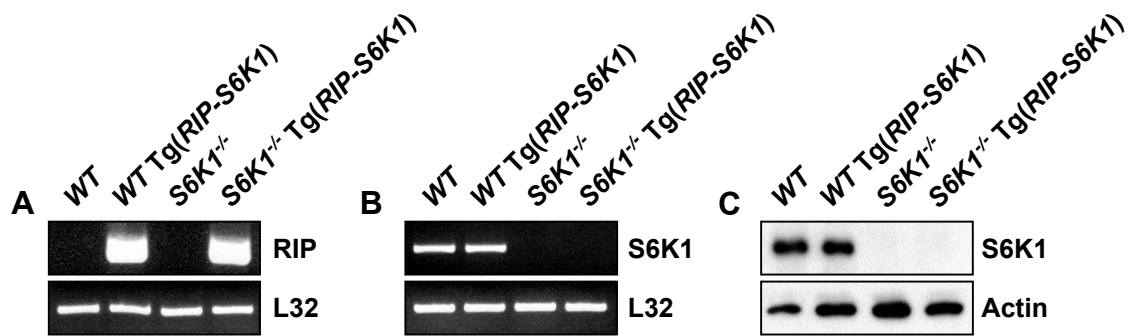

**Supplemental Figure 1. Bone development in *WT* and *S6K1*<sup>-/-</sup> embryos at E17.0.** Lateral view of *WT* and *S6K1*<sup>-/-</sup> mouse skeleton at E17.0 analyzed for ossification, using alcian blue and alizarine red. Arrow indicate areas of diverging ossification stages.

**Supplemental Figure 2. Placenta from embryos at E13.5 and E19.5.** (A-F) Cross section in placentas from embryos at E13.5: Chorionic plate (cp), labyrinthine trophoblast (lt), labyrinthine (lb), spongiotrophoblast (sp) and giant cell (gl) layers. In *S6K1*<sup>-/-</sup> placentas, note the reduced size of the spongiotrophoblast layer: (A-C) Histology by H&E staining; (D-F) Blood vessels by anti-PECAM-1 immunostaining. (G-J) Cross-sections of placenta at E19.5: (G-H) Histology by H&E staining; (I-J) Spongiotrophoblast-specific, *Tpbb* detection by ISH. Arrows indicate the improperly positioned *Tpbb*-expressing cells in the labyrinthine region of the *S6K1*<sup>-/-</sup> placenta. Scale bars: 500µm.

**Supplemental Figure 3. Detection of *Tg(RIP-S6K1)rip*<sup>S6k</sup> transgene expression in embryonic pancreata.** Pancreas sections from embryos at E16.5 analyzed for S6K1 (green) and insulin (red) expression by immunostaining. Nuclei were visualized with DAPI (blue). Scale bars: 25µm.

**Supplemental Figure 4. Body weight of *S6K1*<sup>-/-</sup> *Tg(RIP-S6K1)rip*<sup>S6K1</sup> embryos at E16.5.** Results from weight measurement of n=9-10 embryos per genotype. Values are mean ± SEM. \**P* < 0.05 vs. other genotypes, ANOVA.

**Supplemental Figure 5. Analysis of hypothalamic expression of *Tg(RIP-S6K1)rip*<sup>S6k1</sup> transgene** (A) Genotyping for *rip*<sup>S6</sup> *Tg(RIP-S6K1)*<sup>k1</sup> transgene in mouse brain DNA. (B) *Tg(RIP-S6K1)* *S6K1* transgenic expression in hypothalamic RNA, determined by RT-PCR analysis. (C) Analysis of S6K1 expression in hypothalamus protein extracts by western blot with indicated antibodies. n=3-6 per genotype.
